# Supplementary material for: Electrocatalytic properties of a novel ruthenium(ii) terpyridine-based complex towards CO2 reduction
Source: Royal Society of Chemistry journal article supplement (doi:10.1039/d3dt00121k), 2023-01-01
Supplement: d3dt00121k1.pdf [file d3dt00121k1.pdf]

## Supporting Information

### **Electrocatalytic properties of a novel ruthenium(II) terpyridine-based complex towards CO<sub>2</sub> reduction**

Leandro A. Faustino<sup>1</sup>, Antonio E. H. Machado<sup>1</sup>, Pedro I. S. Maia<sup>2</sup>, Javier J. Concepcion<sup>3</sup>  
and Antonio O. T. Patrocínio<sup>1\*</sup>

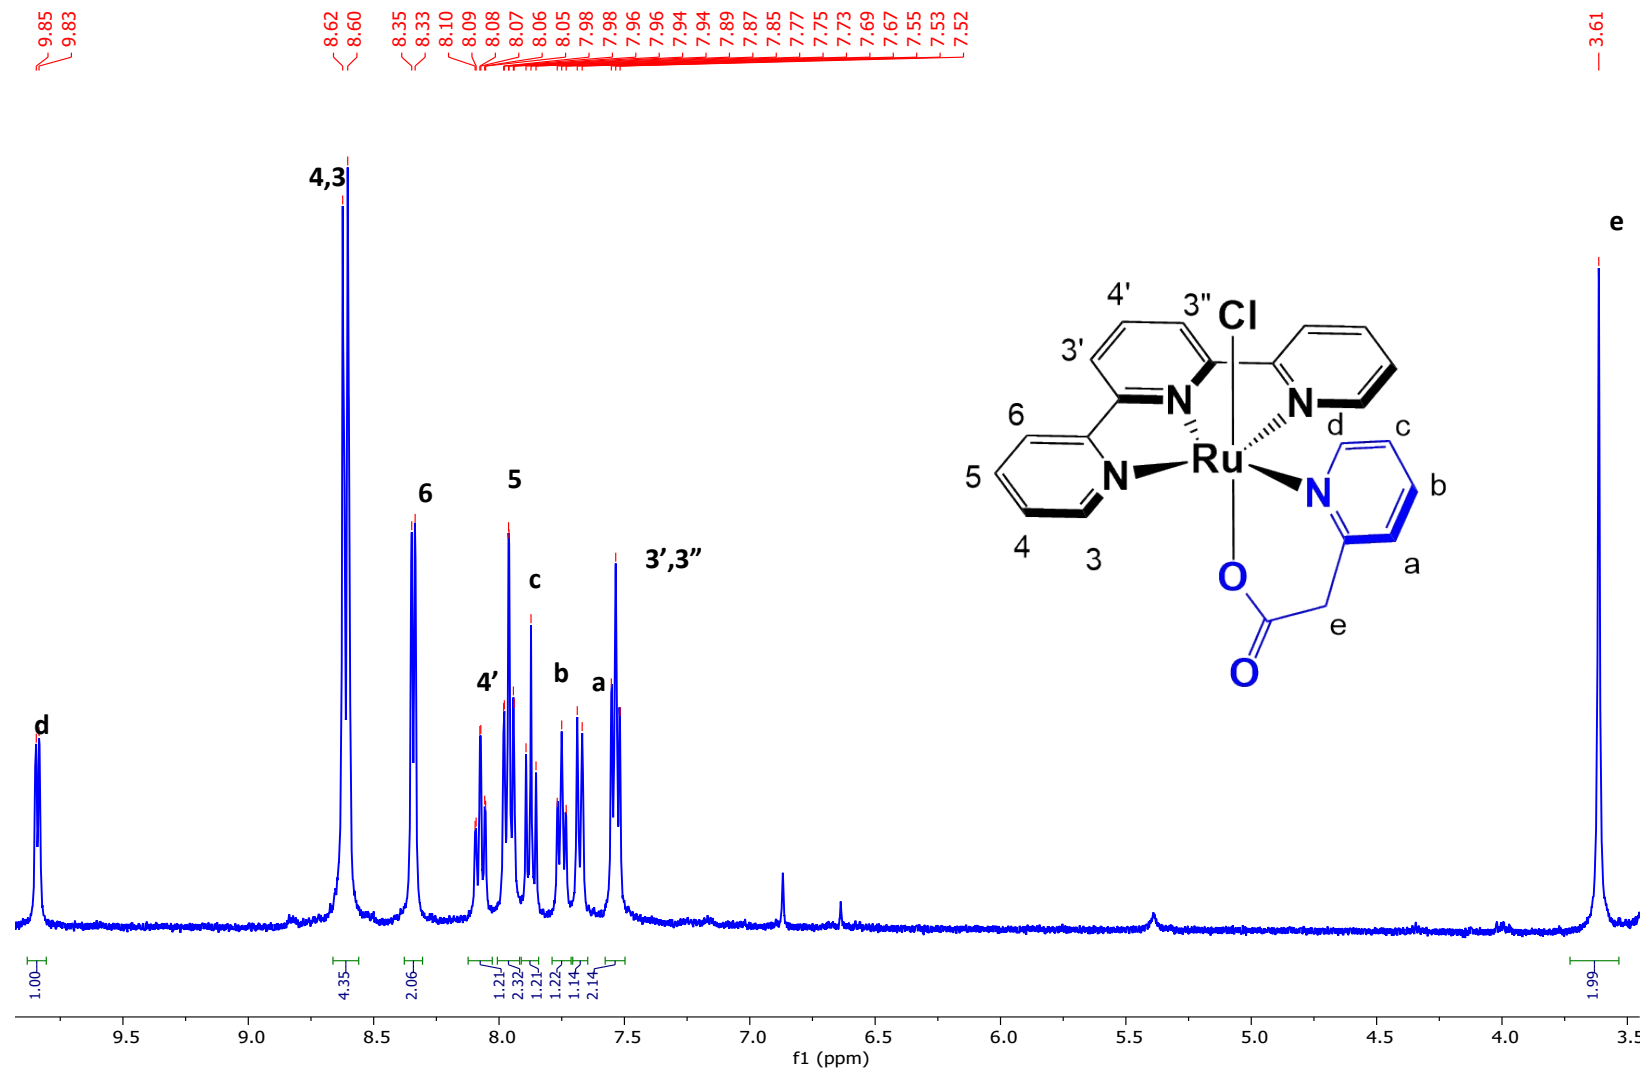

**Figure S1.**  $^1\text{H}$  NMR spectrum in  $\text{DMSO-d}_6$  of  $[\text{RuCl}(\text{trpy})(\text{acpy})]$ , 298 K and 400 MHz.

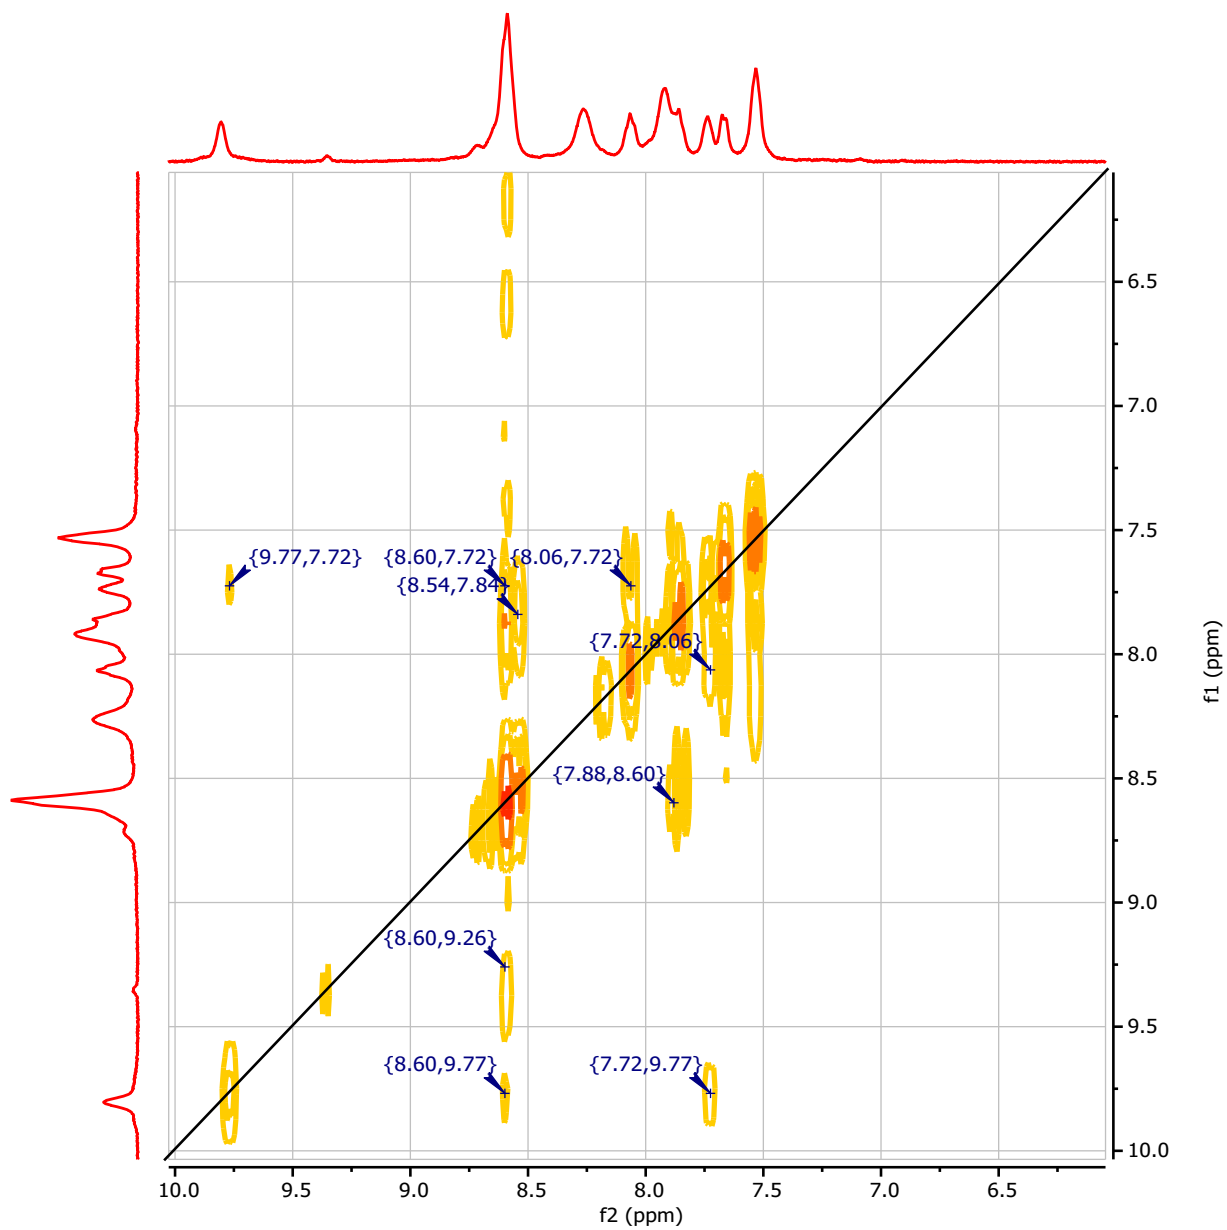

**Figure S2.** H-H Cosy spectrum in DMSO- $d_6$  of [RuCl(trpy)(acpy)], 298 K and 400 MHz.

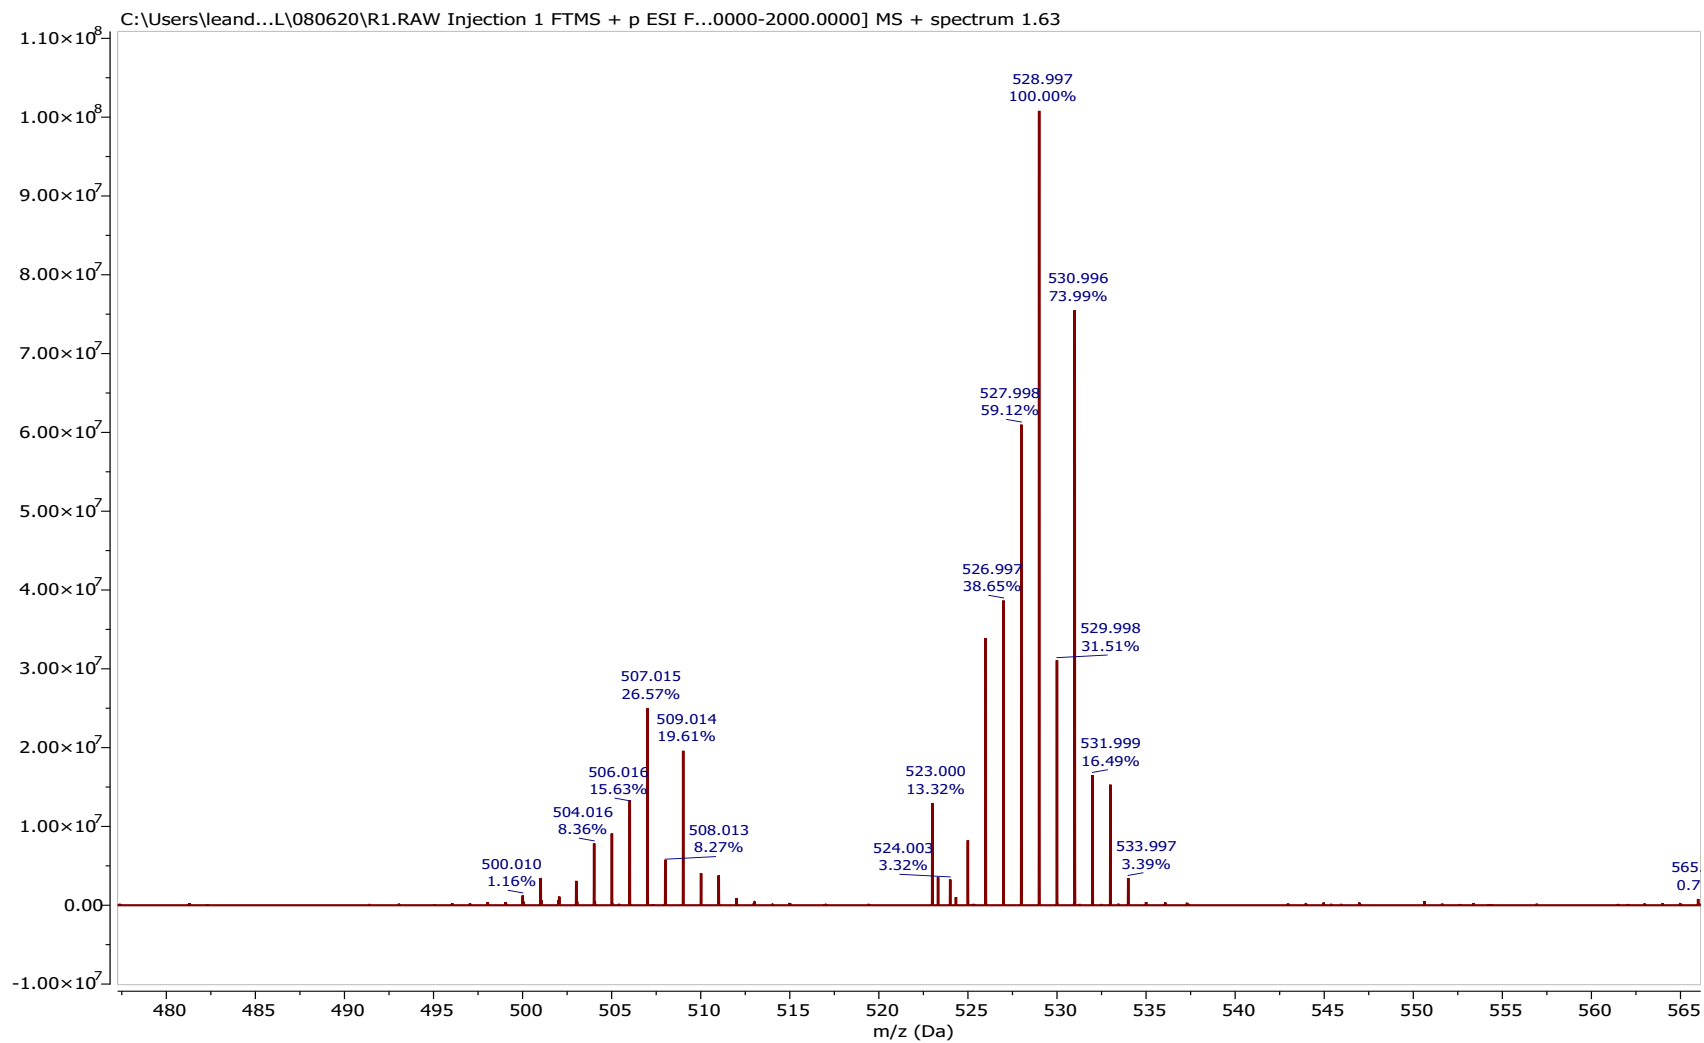

**Figure S3.** Mass spectrum of [RuCl(trpy)(acpy)] in methanol/water (4:1).

### Isomer 1

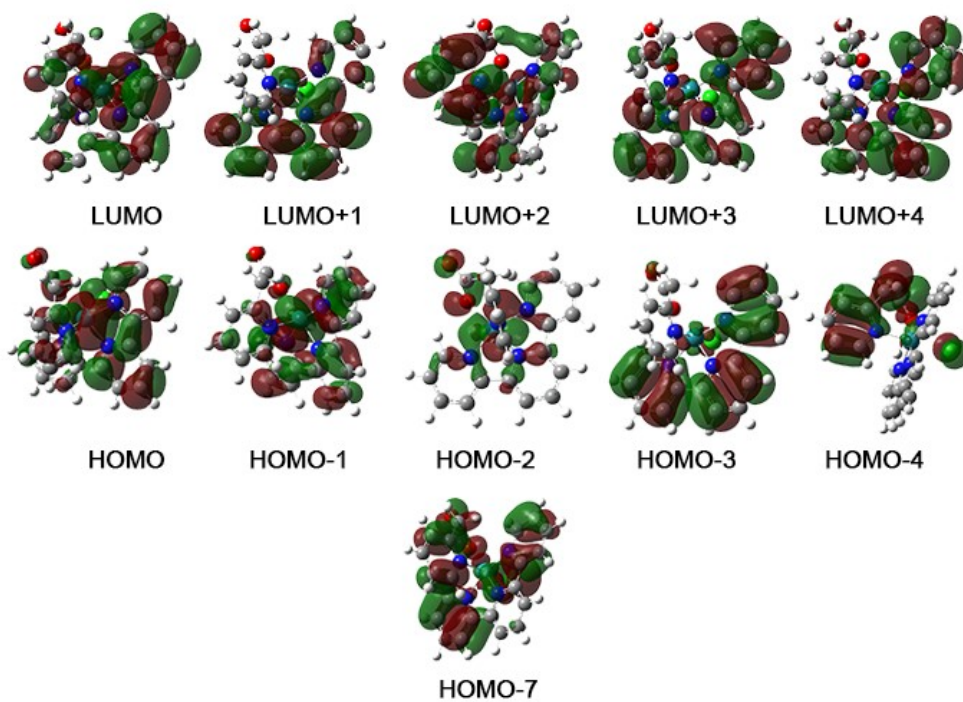

### Isomer 2

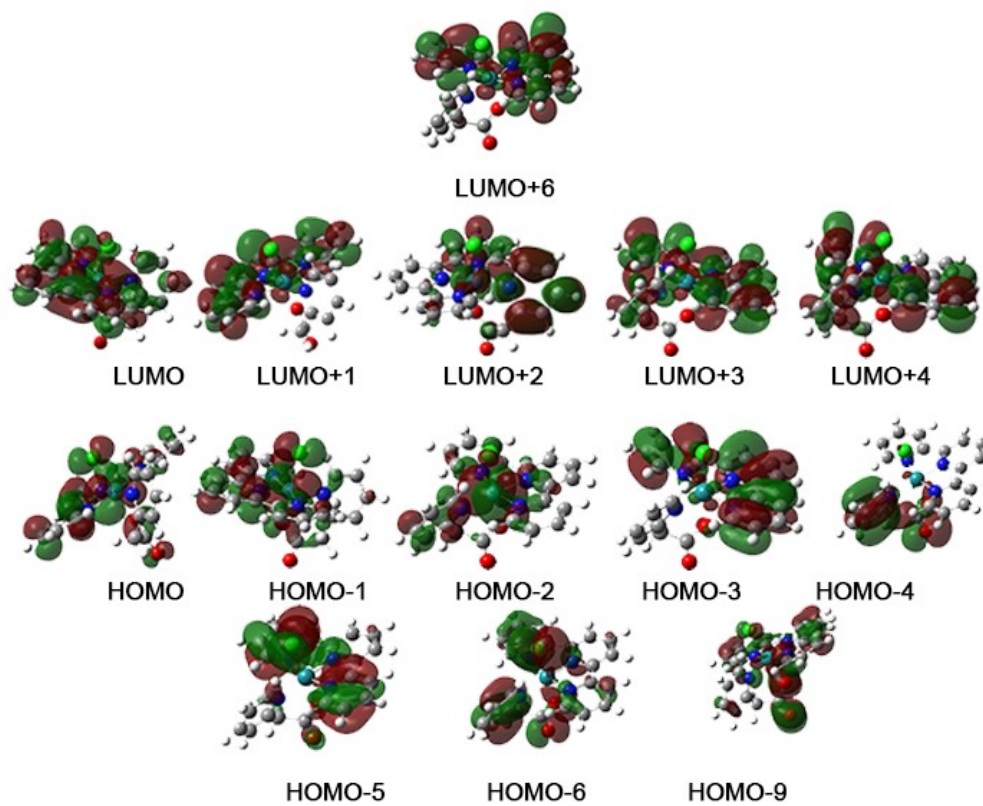

**Figure S4.** Representative images of electronic transitions of [RuCl(trpy)(acpy)] in acetonitrile.

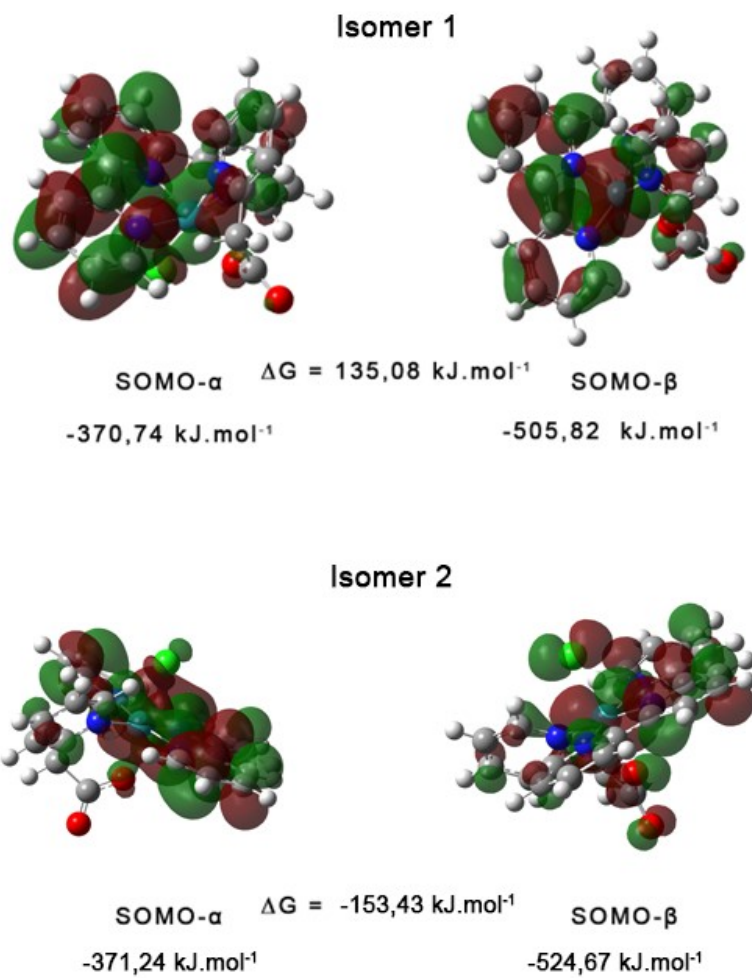

**Figure S5.** Orbitals SOMO- $\alpha$  and SOMO- $\beta$  of [RuCl(trpy)(acpy)] reduced by one electron.

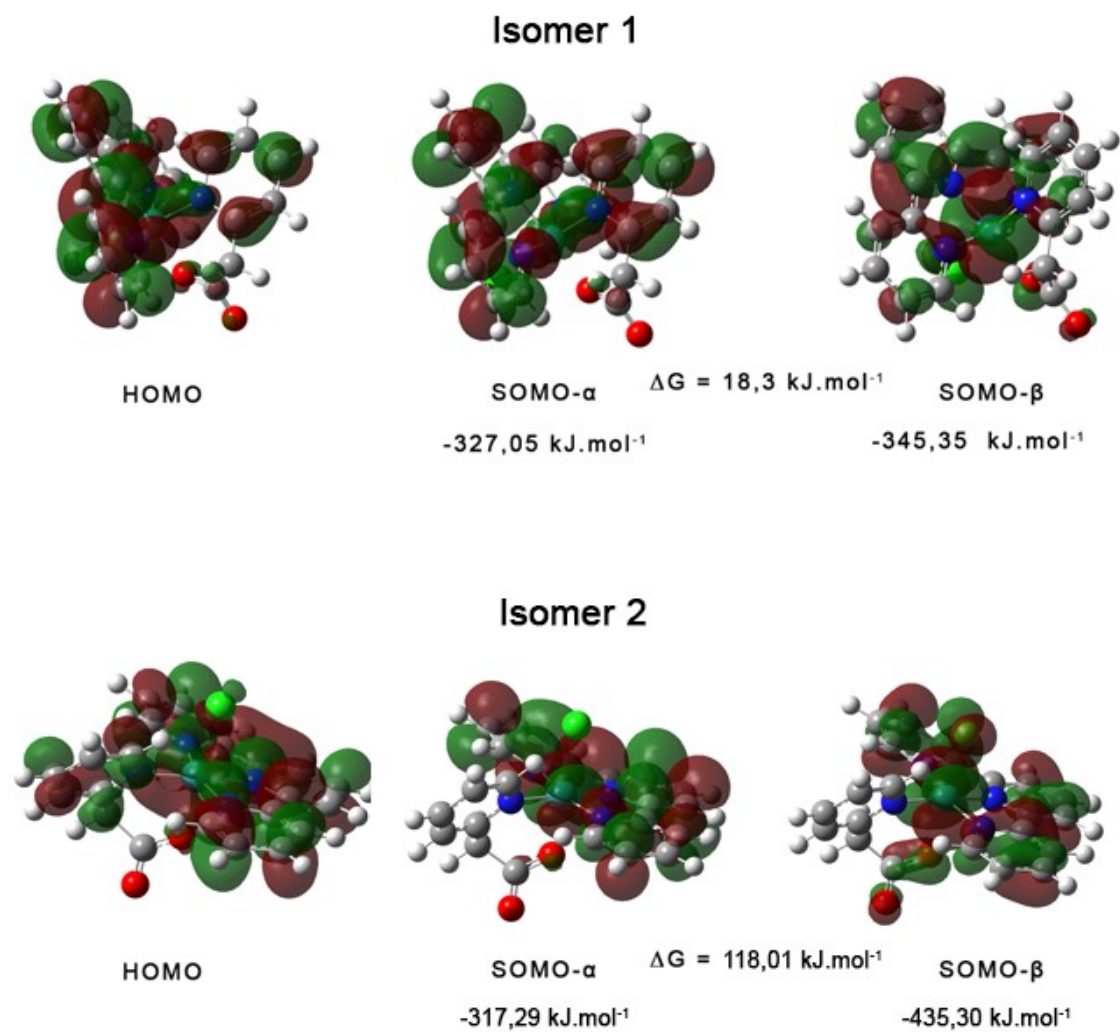

**Fig**

re S6. Orbitals HOMO, SOMO- $\alpha$  and SOMO- $\beta$  of [RuCl(trpy)(acpy)] reduced by two electrons.

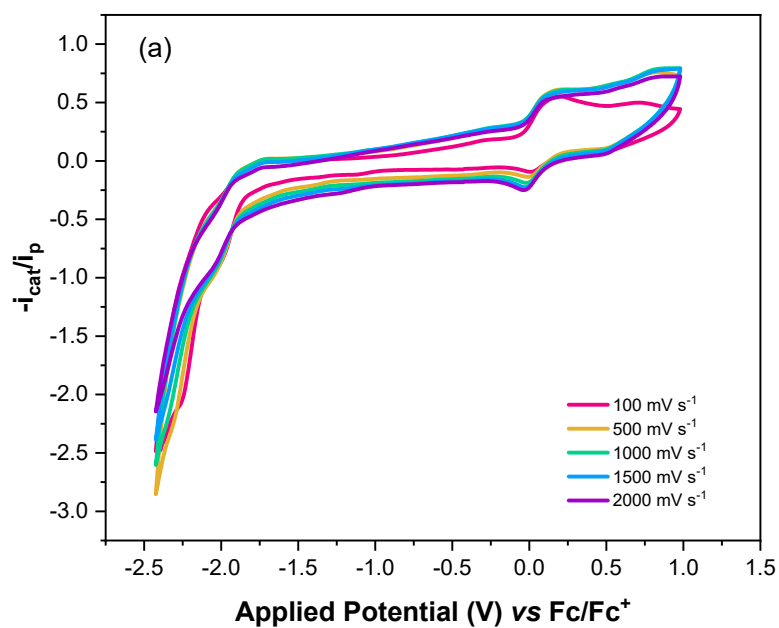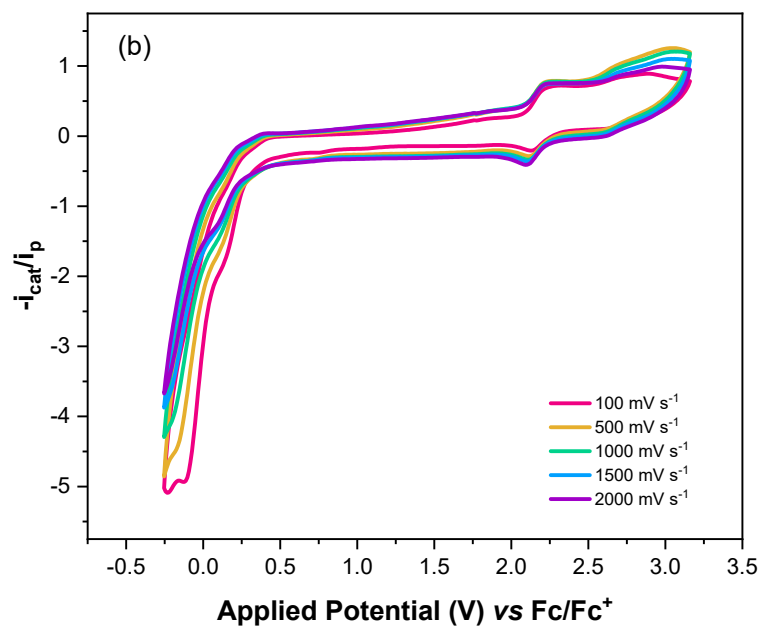

**Fig S7.** Plots of  $i_{cat}/i_p$  at different scan rates (a) in acetonitrile (b) and in 1% H<sub>2</sub>O/CH<sub>3</sub>CN mixture.



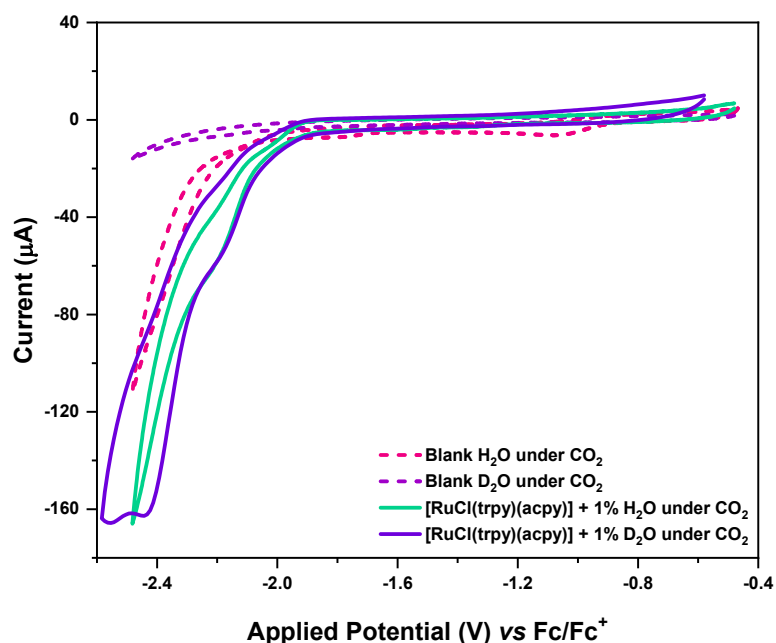

**Figure S8.** Cyclic voltammeteries of 1 mM [RuCl(trpy)(acpy)] in 0.1 M TBAPF<sub>6</sub>/CH<sub>3</sub>CN under CO<sub>2</sub> atmosphere at 100 mV s<sup>-1</sup> in the presence of 1% H<sub>2</sub>O or D<sub>2</sub>O.

### Construction of Tafel Plots

Tafel plots for the [RuCl(trpy)(acpy)] catalyst were obtained in bare acetonitrile and 1% H<sub>2</sub>O/CH<sub>3</sub>CN solutions. The equation below, described by Rountree et al.<sup>1</sup> were employing assuming  $TOF_{max} = k_{obs}$  (1.5 s<sup>-1</sup> for CH<sub>3</sub>CN and 2.0 s<sup>-1</sup> for 1% H<sub>2</sub>O/CH<sub>3</sub>CN mixture),  $E^0_{CO_2/CO} = -1.40$  V vs Fc/Fc<sup>+</sup> as reported by Matsubara<sup>2</sup>,  $E_{cat/2}$  is the potential at which the homogeneous catalytic wave reaches half of its maximum current (-2.14 V vs Fc/Fc<sup>+</sup>) and  $\eta$  is the overpotential required to trigger the reaction at a specific rate.

$$TOF = \frac{TOF_{max}}{1 + \exp \left[ \frac{F}{RT} \left( E_{CO_2}^0 - E_{cat} \right) \right] \exp \left( -\frac{F}{RT} \eta \right)}$$

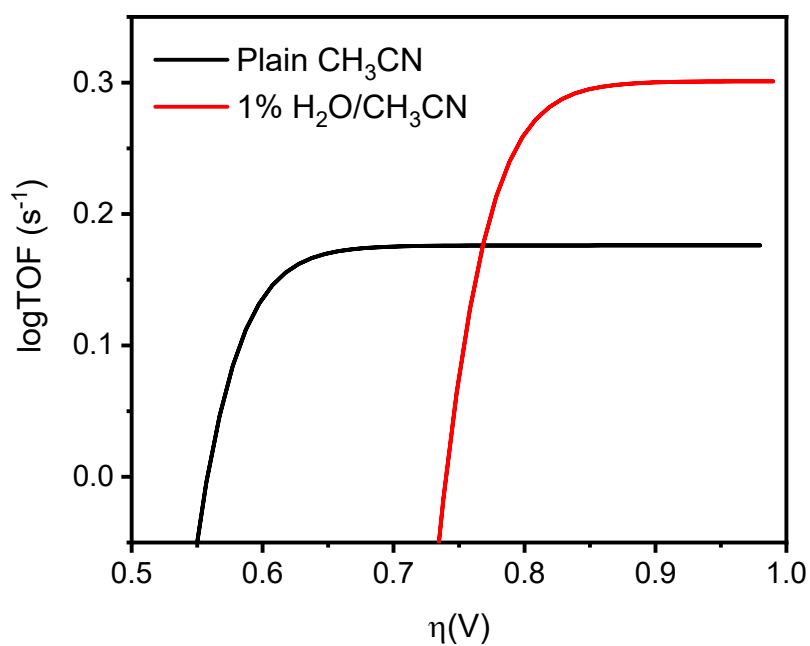

**Figure S9.** Tafel plot of [RuCl(trpy)(acpy)] in plain acetonitrile and mixture of 1% H<sub>2</sub>O

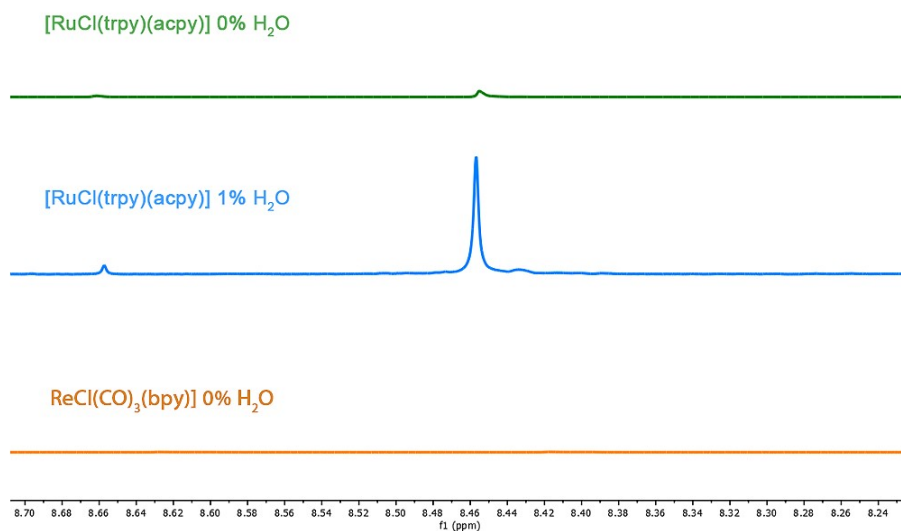

**Figure S10.** <sup>1</sup>H NMR in D<sub>2</sub>O after bulk of electrolysis at -2.18 V vs Fc/Fc<sup>+</sup> in 0.1 M TBAPF<sub>6</sub>/CH<sub>3</sub>CN of 1 mM [RuCl(trpy)(acpy)] in anhydrous and with 1% of H<sub>2</sub>O, and the standard *fac*-[ReCl(CO)<sub>3</sub>(bpy)].

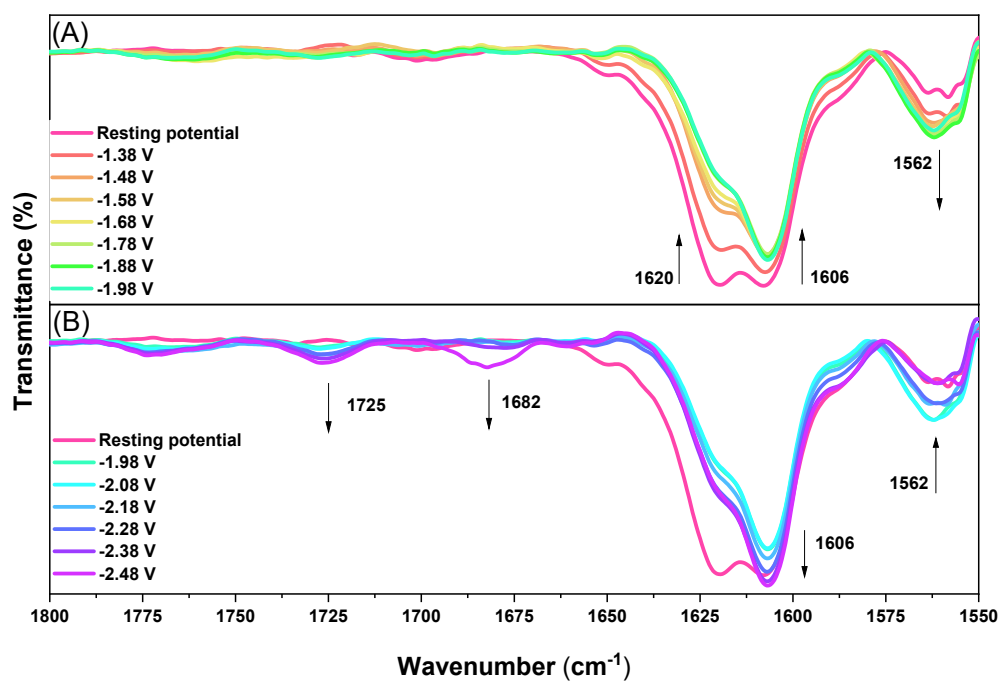

**Figure S11.** Changes in the FTIR spectra of 1 mM [RuCl(trpy)(acpy)] during the spectroelectrochemistry in 0.1 M TBAPF<sub>6</sub>/CH<sub>2</sub>Cl<sub>2</sub> varying potential under CO<sub>2</sub> atmosphere  $\Delta t = 1.5$  min.

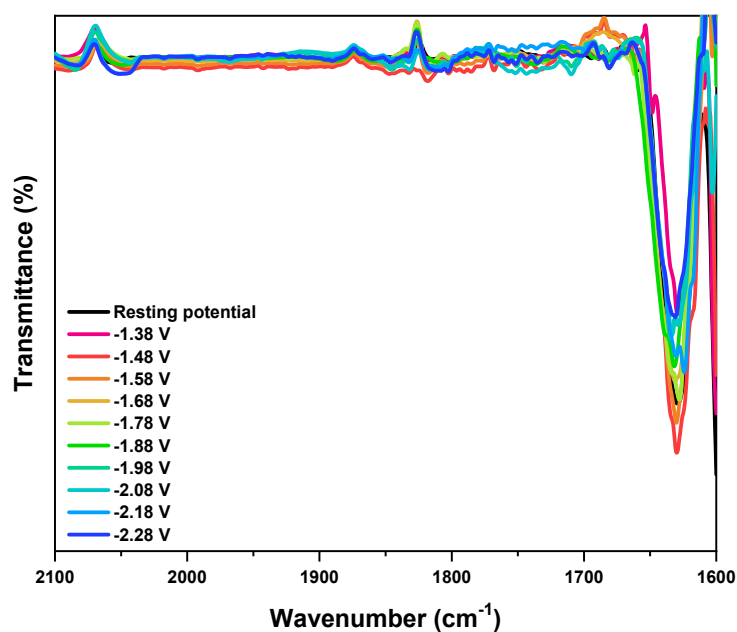

**Figure S12.** FTIR spectra of the bare electrolyte (0.1 M TBAPF<sub>6</sub>/CH<sub>3</sub>CN) as a function of the applied potential under CO<sub>2</sub> atmosphere;  $\Delta t = 1.5$  min.

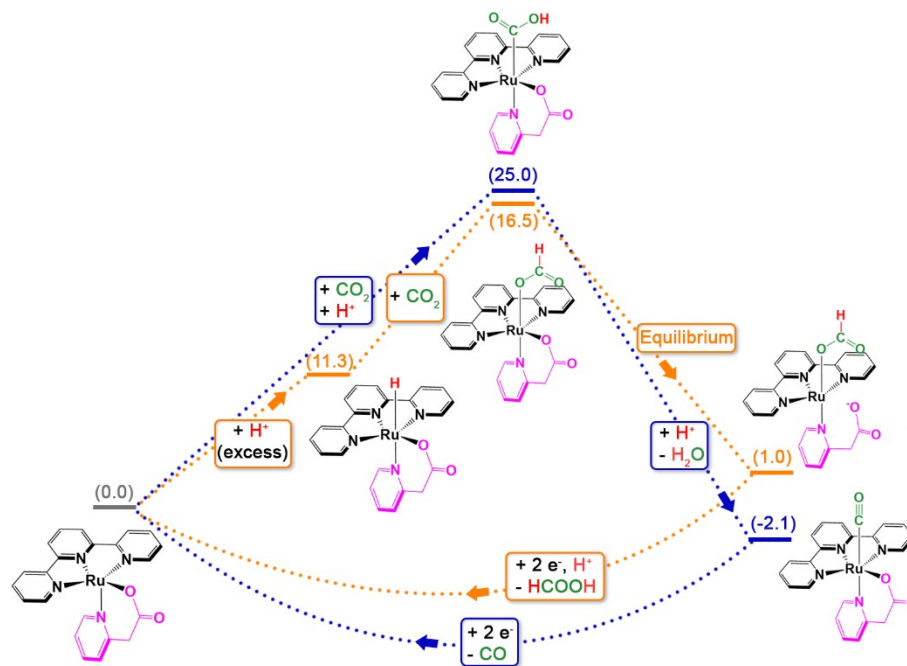

**Figure S13.** Thermodynamic free energy profile in kcal mol<sup>-1</sup> obtained through theoretical calculation during CO<sub>2</sub> reduction mediated by the [RuCl(trpy)(acpy)] complex (isomer 1) considering the primary (blue) and the secondary (orange) pathways.

**Table S1.** <sup>1</sup>H NMR Chemical shifts and coupling constants of [RuCl(trpy)(acpy)].

| Structure | Proton              | $\delta$ / ppm | J / Hz |                  |
|-----------|---------------------|----------------|--------|------------------|
|           | H <sub>3</sub>      | d              | 8.61   | 8.0              |
|           | H <sub>4</sub>      | d              | 8.61   | 8.0              |
|           | H <sub>5</sub>      | td             | 7.96   | 4.0 / 8.0 / 16.0 |
|           | H <sub>6</sub>      | d              | 8.34   | 8.0              |
|           | H <sub>3'/3''</sub> | td             | 7.55   | 4.0 / 8.0 / 12.0 |
|           | H <sub>4'</sub>     | td             | 8.07   | 4.0 / 8.0 / 20.0 |
|           | H <sub>a</sub>      | d              | 7.68   | 8.0              |

|  |                |   |      |            |
|--|----------------|---|------|------------|
|  | H <sub>b</sub> | t | 7.75 | 8.0 / 16.0 |
|  | H <sub>c</sub> | t | 7.87 | 8.0 / 16.0 |
|  | H <sub>d</sub> | d | 9.84 | 8.0        |
|  | H <sub>e</sub> | s | 3.61 | -          |

d= doublet, td = triple doublet, t = triplet, s = singlet.

**Table S2.** Crystal data and structure refinement for [RuCl(trpy)(acpy)].

|                                   |                                                                     |                 |
|-----------------------------------|---------------------------------------------------------------------|-----------------|
| Identification code               | shelx                                                               |                 |
| Empirical formula                 | C <sub>22</sub> H <sub>21</sub> Cl N <sub>4</sub> O <sub>4</sub> Ru |                 |
| Formula weight                    | 541.95                                                              |                 |
| Temperature                       | 200(2) K                                                            |                 |
| Wavelength                        | 0.71073 Å                                                           |                 |
| Crystal system                    | Triclinic                                                           |                 |
| Space group                       | P -1                                                                |                 |
| Unit cell dimensions              | a = 8.9094(8) Å                                                     | a = 92.649(8)°. |
| b = 8.9354(9) Å                   | b = 99.764(7)°.                                                     |                 |
| c = 13.7859(13) Å                 | g = 98.885(7)°.                                                     |                 |
| Volume                            | 1065.65(18) Å <sup>3</sup>                                          |                 |
| Z                                 | 2                                                                   |                 |
| Density (calculated)              | 1.689 Mg/m <sup>3</sup>                                             |                 |
| Absorption coefficient            | 0.899 mm <sup>-1</sup>                                              |                 |
| F(000)                            | 548                                                                 |                 |
| Crystal size                      | 0.460 x 0.220 x 0.040 mm <sup>3</sup>                               |                 |
| Theta range for data collection   | 4.762 to 29.160°.                                                   |                 |
| Index ranges                      | -12 ≤ h ≤ 12, -12 ≤ k ≤ 12, -17 ≤ l ≤ 18                            |                 |
| Reflections collected             | 11922                                                               |                 |
| Independent reflections           | 5673 [R(int) = 0.0440]                                              |                 |
| Completeness to theta = 25.242°   | 98.6 %                                                              |                 |
| Absorption correction             | None                                                                |                 |
| Refinement method                 | Full-matrix least-squares on F <sup>2</sup>                         |                 |
| Data / restraints / parameters    | 5673 / 4 / 305                                                      |                 |
| Goodness-of-fit on F <sup>2</sup> | 0.949                                                               |                 |
| Final R indices [I > 2σ(I)]       | R1 = 0.0326, wR2 = 0.0695                                           |                 |
| R indices (all data)              | R1 = 0.0473, wR2 = 0.0729                                           |                 |
| Extinction coefficient            | n/a                                                                 |                 |
| Largest diff. peak and hole       | 0.783 and -0.957 e.Å <sup>-3</sup>                                  |                 |

**Table S3.** Electronic transitions of [RuCl(trpy)(acpy)] and the correspondent oscillator strength for each isomer.

| <b>Isomer 1</b>                     |                            |                                                     |                                                                       |
|-------------------------------------|----------------------------|-----------------------------------------------------|-----------------------------------------------------------------------|
| <b><math>\lambda</math> nm (eV)</b> | <b>Oscillator Strength</b> | <b>Transition</b>                                   | <b>Nature</b>                                                         |
| 655.67 (1.89)                       | 0.0137                     | H-2→L (39.4%)<br>H-1→L (32.4%)<br>H→L (7.5%)        | MLCT $d_{Ru} \rightarrow \pi$ trpy                                    |
| 639.27 (1.94)                       | 0.0199                     | H-2→L (40.3%)<br>H-1→L (21.5%)<br>H→L (16.%)        | MLCT $d_{Ru} \rightarrow \pi$ trpy                                    |
| 540.43 (2.29)                       | 0.0214                     | H-1→L (40.0%)<br>H→L (24.3%)<br>H→L+1 (30.5%)       | MLCT $d_{Ru} \rightarrow \pi$ trpy                                    |
| 513.65 (2.41)                       | 0.1216                     | H-1→L+1 (13.3%)<br>H→L (27.6%)<br>H→L+1 (56.8%)     | MLCT $d_{Ru} \rightarrow \pi$ trpy                                    |
| 459.29 (2.70)                       | 0.0038                     | H-2→L (15.8%)<br>H-2→L+1 (72.0%)                    | MLCT $d_{Ru} \rightarrow \pi$ trpy                                    |
| 440.50 (2.81)                       | 0.1192                     | H-1→L+1 (64.3%)<br>H→L (24.3%)                      | MLCT $d_{Ru} \rightarrow \pi$ trpy<br>IL $\pi$ trpy→ $\pi^*$ trpy     |
| 378.67 (3.27)                       | 0.1100                     | H-2→L+2 (10.2%)<br>H-1→L+2 (46.9%)<br>H→L+2 (39.0%) | MLCT $d_{Ru} \rightarrow \pi^*$ acpy<br>LLCT $\pi$ trpy→ $\pi^*$ acpy |
| 351.26 (3.53)                       | 0.0966                     | H→L+3 (100%)                                        | MLCT $d_{Ru} \rightarrow \pi$ trpy<br>IL $\pi$ trpy→ $\pi^*$ trpy     |
| 338.02 (3.67)                       | 0.1712                     | H-2→L+3 (20.4%)<br>H-1→L+3 (79.6%)                  | MLCT $d_{Ru} \rightarrow \pi$ trpy<br>IL $\pi$ trpy→ $\pi^*$ trpy     |
| 275.53 (4.50)                       | 0.3978                     | H-3→L (54.7%)<br>H-1→L+6 (22.1%)<br>H→L+6 (13.3%)   | MLCT $d_{Ru} \rightarrow \pi$ trpy<br>IL $\pi$ trpy→ $\pi^*$ trpy     |
| 252.71 (4.90)                       | 0.4477                     | H-3→L (9.6%)                                        | MLCT $d_{Ru} \rightarrow \pi$ trpy                                    |

|               |        |                                                     |                                                                                              |
|---------------|--------|-----------------------------------------------------|----------------------------------------------------------------------------------------------|
|               |        | H-3→L+1 (56.3%)<br>H-2→L+6 (9.9%)<br>H→L+6 (8.5%)   | IL $\pi$ tpy→ $\pi^*$ tpy                                                                    |
| 242.61 (5.11) | 0.1436 | H-4→L (77.9%)<br>H-4→L+2 (14.3%)                    | LLCT $\pi$ acpy→ $\pi^*$ tpy<br>LLCT $n$ Cl→ $\pi^*$ tpy/acpy<br>IL $\pi$ acpy→ $\pi^*$ acpy |
| 217.80 (5.69) | 0.2491 | H-4→L+1 (26.8%)<br>H-3→L+3 (42.3%)                  | IL $\pi$ tpy→ $\pi^*$ tpy<br>LLCT $\pi$ acpy→ $\pi^*$ tpy<br>LLCT $n$ Cl→ $\pi$ tpy          |
| 214.07 (5.79) | 0.1863 | H-7→L (18.4%)<br>H-4→L+1 (29.7%)<br>H-3→L+3 (12.6%) | IL $\pi$ tpy→ $\pi^*$ tpy<br>LLCT $\pi$ acpy→ $\pi^*$ tpy                                    |

### Isomer 2

| $\lambda$ nm (eV) | Oscillator Strength | Transition                                        | Nature                                                 |
|-------------------|---------------------|---------------------------------------------------|--------------------------------------------------------|
| 748.22 (1.65)     | 0.0412              | H-1→L (74.8%)<br>H→L (25.2%)                      | MLCT $d$ Ru→ $\pi$ tpy                                 |
| 589.77 (2.10)     | 0.0259              | H-1→L (50.9%)<br>H→L (18.4%)<br>H→L+1 (19.5%)     | MLCT $d$ Ru→ $\pi$ tpy                                 |
| 518.11 (2.39)     | 0.0925              | H-1→L+1 (58.1%)<br>H→L+1 (41.9%)                  | MLCT $d$ Ru→ $\pi$ tpy                                 |
| 464.03 (2.67)     | 0.1216              | H-1→L (20.3%)<br>H-1→L+1 (36.1%)<br>H→L+1 (39.7%) | MLCT $d$ Ru→ $\pi$ tpy                                 |
| 403.68 (3.07)     | 0.0079              | H-1→L+2 (9.5.8%)<br>H→L+2 (85.2%)                 | MLCT $d$ Ru→ $\pi$ tpy                                 |
| 377.89 (3.28)     | 0.0184              | H-2→L+2 (5.5%)<br>H-1→L+2 (79.0%)<br>H→L+2 (6.9%) | MLCT $d$ Ru→ $\pi$ tpy<br>LLCT $\pi$ tpy→ $\pi^*$ acpy |
| 367.88 (3.37)     | 0.2040              | H→L+3 (81.1%)<br>H→L+4 (81.1%)                    | MLCT $d$ Ru→ $\pi$ tpy<br>IL $\pi$ tpy→ $\pi^*$ tpy    |
| 353.26 (3.50)     | 0.0787              | H-2→L+2 (8.2%)                                    | MLCT $d$ Ru→ $\pi$ tpy                                 |



|               |        |                                                     |                                                                                              |
|---------------|--------|-----------------------------------------------------|----------------------------------------------------------------------------------------------|
|               |        | H-1→L+3 (66.1%)<br>H→L+4 (16.6%)                    | MLCT <sub>d Ru→π аcry</sub><br>IL <sub>π tpy→π* tpy</sub>                                    |
| 346.16 (3.58) | 0.2538 | H-2→L+2 (57.9%)<br>H-1→L+3 (21.8%)<br>H→L+4 (11.0%) | MLCT <sub>d Ru→π tpy</sub><br>LLCT <sub>π tpy→π* аcry</sub><br>IL <sub>π tpy→π* tpy</sub>    |
| 284.84 (4.35) | 0.2826 | H-3→L (27.4%)<br>H→L+6 (64.6%)                      | MLCT <sub>d Ru→π tpy</sub><br>LLCT <sub>π tpy→π* аcry</sub><br>IL <sub>π tpy→π* tpy</sub>    |
| 276.71 (4.48) | 0.2429 | H-3→L (68.8%)<br>H→L+6 (31.2%)                      | MLCT <sub>d Ru→π tpy</sub><br>LLCT <sub>π tpy→π* аcry</sub><br>IL <sub>π tpy→π* tpy</sub>    |
| 253.61 (4.89) | 0.4298 | H-3→L (75.9%)<br>H-2→L+6 (8.2%)                     | IL <sub>π tpy→π* tpy</sub><br>LLCT <sub>n Cl→π* tpy</sub><br>LLCT <sub>π tpy→π* аcry</sub>   |
| 241.38 (5.13) | 0.0729 | H-4→L (81.0%)<br>H-4→L+2 (14.8%)                    | IL <sub>π аcry→π* аcry</sub><br>LLCT <sub>π аcry→π* tpy</sub>                                |
| 233.92 (5.30) | 0.0171 | H-6→L (18.4%)<br>H-5→L+1 (29.7%)                    | IL <sub>π аcry→π* аcry</sub><br>LLCT <sub>π аcry→π* tpy</sub><br>LLCT <sub>n Cl→π* tpy</sub> |
| 218.48 (5.67) | 0.3172 | H-9→L (13.0%)<br>H-5→L+1 (40.8%)<br>H-3→L+3 (20.9%) | IL <sub>π tpy→π* tpy</sub><br>LLCT <sub>n Cl→π* tpy</sub>                                    |

**Table S4.** Distance bond of reduced species obtained by TD-DFT.

| <b>Isomer 1</b>                            |                   |                  |                                 |                                    |                                    |                                    |
|--------------------------------------------|-------------------|------------------|---------------------------------|------------------------------------|------------------------------------|------------------------------------|
| <b>Electrons inserted in the structure</b> | <b>Ru-Cl (pm)</b> | <b>Ru-O (pm)</b> | <b>Ru-N<sub>acpy</sub> (pm)</b> | <b>Ru-N<sub>1(trpy)</sub> (pm)</b> | <b>Ru-N<sub>2(trpy)</sub> (pm)</b> | <b>Ru-N<sub>3(trpy)</sub> (pm)</b> |
| 0                                          | 237.152           | 204.538          | 204.004                         | 199.381                            | 187.817                            | 200.901                            |
| 1 (Doublet)                                | 240.750           | 206.858          | 199.971                         | 197.829                            | 190.265                            | 200.687                            |
| 2 (Singlet)                                | 247.117           | 208.518          | 194.925                         | 197.153                            | 192.241                            | 197.679                            |
| 2 (Triplet)                                | 244.155           | 208.016          | 196.156                         | 200.535                            | 191.293                            | 200.453                            |

  

| <b>Isomer 2</b>                            |                   |                  |                                 |                                    |                                    |                                    |
|--------------------------------------------|-------------------|------------------|---------------------------------|------------------------------------|------------------------------------|------------------------------------|
| <b>Electrons inserted in the structure</b> | <b>Ru-Cl (pm)</b> | <b>Ru-O (pm)</b> | <b>Ru-N<sub>acpy</sub> (pm)</b> | <b>Ru-N<sub>1(trpy)</sub> (pm)</b> | <b>Ru-N<sub>2(trpy)</sub> (pm)</b> | <b>Ru-N<sub>3(trpy)</sub> (pm)</b> |
| 0                                          | 237.790           | 202.372          | 206.086                         | 198.999                            | 189.764                            | 200.890                            |
| 1 (Doublet)                                | 241.137           | 203.700          | 202.160                         | 199.015                            | 192.811                            | 197.266                            |
| 2 (Singlet)                                | 244.295           | 204.135          | 197.281                         | 196.045                            | 194.584                            | 197.536                            |
| 2 (Triplet)                                | 242.729           | 205.151          | 198.829                         | 200.826                            | 193.798                            | 201.947                            |

## References

1. E. S. Rountree, B. D. McCarthy, T. T. Eisenhart and J. L. Dempsey, *Inorg. Chem.*, 2014, **53**, 9983-10002.
2. Y. Matsubara, *ACS Energy Letters*, 2019, **4**, 1999-2004.
